# Supplementary material for: CRONDEX: a web-based platform for exploring links between chromatin- related genes and neurodevelopmental disorders
Source: Research Square preprint supplement (doi:10.21203/rs.3.rs-8767656/v1), 2026-02-11
Supplement: Supplementary file 1 [file 5657a94146255c2155280abf.xlsx]

## Sheet: ST1-CRONDEX-ALL-genes
gene_symbol	ncbi_gene_id	gene_name
ACTB	60	actin beta
ACTL6A	86	actin like 6A
ACTL6B	51412	actin like 6B
ADNP	23394	activity dependent neuroprotector homeobox
ANP32A	8125	acidic nuclear phosphoprotein 32 family member A
ARID1A	8289	AT-rich interaction domain 1A
ARID1B	57492	AT-rich interaction domain 1B
ARID2	196528	AT-rich interaction domain 2
ASH1L	55870	ASH1 like histone lysine methyltransferase
ASH2L	9070	ASH2 like, histone lysine methyltransferase complex subunit
ASXL1	171023	ASXL transcriptional regulator 1
ASXL2	55252	ASXL transcriptional regulator 2
ASXL3	80816	ASXL transcriptional regulator 3
ATAD2B	54454	ATPase family AAA domain containing 2B
ATF7IP	55729	activating transcription factor 7 interacting protein
ATM	472	ATM serine/threonine kinase
ATN1	1822	atrophin 1
ATR	545	ATR serine/threonine kinase
ATRX	546	ATRX chromatin remodeler
ATXN7L3	56970	ataxin 7 like 3
BAP1	8314	BRCA1 associated deubiquitinase 1
BAZ1A	11177	bromodomain adjacent to zinc finger domain 1A
BAZ1B	9031	bromodomain adjacent to zinc finger domain 1B
BAZ2B	29994	bromodomain adjacent to zinc finger domain 2B
BCOR	54880	BCL6 corepressor
BCORL1	63035	BCL6 corepressor like 1
BPTF	2186	bromodomain PHD finger transcription factor
BRCA1	672	BRCA1 DNA repair associated
BRD3	8019	bromodomain containing 3
BRD4	23476	bromodomain containing 4
BRPF1	7862	bromodomain and PHD finger containing 1
BRWD1	54014	bromodomain and WD repeat domain containing 1
BRWD3	254065	bromodomain and WD repeat domain containing 3
CBX1	10951	chromobox 1
CBX4	8535	chromobox 4
CDC6	990	cell division cycle 6
CDK5	1020	cyclin dependent kinase 5
CDK9	1025	cyclin dependent kinase 9
CELF2	10659	CUGBP Elav-like family member 2
CHAF1B	8208	chromatin assembly factor 1 subunit B
CHD1	1105	chromodomain helicase DNA binding protein 1
CHD1L	9557	chromodomain helicase DNA binding protein 1 like
CHD2	1106	chromodomain helicase DNA binding protein 2
CHD3	1107	chromodomain helicase DNA binding protein 3
CHD4	1108	chromodomain helicase DNA binding protein 4
CHD5	26038	chromodomain helicase DNA binding protein 5
CHD7	55636	chromodomain helicase DNA binding protein 7
CHD8	57680	chromodomain helicase DNA binding protein 8
CHD9	80205	chromodomain helicase DNA binding protein 9
CIT	11113	citron rho-interacting serine/threonine kinase
CRB2	286204	crumbs cell polarity complex component 2
CREBBP	1387	CREB binding protein
CSNK2A1	1457	casein kinase 2 alpha 1
CTBP1	1487	C-terminal binding protein 1
CTR9	9646	CTR9 homolog, Paf1/RNA polymerase II complex component
CUL3	8452	cullin 3
CUL4B	8450	cullin 4B
DDB1	1642	damage specific DNA binding protein 1
DDX17	10521	DEAD-box helicase 17
DDX50	79009	DExD-box helicase 50
DHX9	1660	DExH-box helicase 9
DNMT3A	1788	DNA methyltransferase 3 alpha
DNMT3B	1789	DNA methyltransferase 3 beta
DOT1L	84444	DOT1 like histone lysine methyltransferase
DPF2	5977	double PHD fingers 2
EED	8726	embryonic ectoderm development
EHMT1	79813	euchromatic histone lysine methyltransferase 1
EHMT2	10919	euchromatic histone lysine methyltransferase 2
EIF4A3	9775	eukaryotic translation initiation factor 4A3
ELP2	55250	elongator acetyltransferase complex subunit 2
ELP4	26610	elongator acetyltransferase complex subunit 4
EP300	2033	E1A binding protein p300
EP400	57634	E1A binding protein p400
ERBB4	2066	erb-b2 receptor tyrosine kinase 4
ERCC6	2074	ERCC excision repair 6, chromatin remodeling factor
EXOSC2	23404	exosome component 2
EXOSC3	51010	exosome component 3
EXOSC4	54512	exosome component 4
EXOSC5	56915	exosome component 5
EXOSC8	11340	exosome component 8
EXOSC9	5393	exosome component 9
EZH1	2145	enhancer of zeste 1 polycomb repressive complex 2 subunit
EZH2	2146	enhancer of zeste 2 polycomb repressive complex 2 subunit
FBRSL1	57666	fibrosin like 1
FTO	79068	FTO alpha-ketoglutarate dependent dioxygenase
GATAD2A	54815	GATA zinc finger domain containing 2A
GATAD2B	57459	GATA zinc finger domain containing 2B
HCFC1	3054	host cell factor C1
HDAC1	3065	histone deacetylase 1
HDAC2	3066	histone deacetylase 2
HDAC3	8841	histone deacetylase 3
HDAC4	9759	histone deacetylase 4
HDAC6	10013	histone deacetylase 6
HDAC8	55869	histone deacetylase 8
HIRA	7290	histone cell cycle regulator
HLCS	3141	holocarboxylase synthetase
HMG20A	10363	high mobility group 20A
HMGB1	3146	high mobility group box 1
HNRNPU	3192	heterogeneous nuclear ribonucleoprotein U
HNRNPL	3191	heterogeneous nuclear ribonucleoprotein L
HUWE1	10075	HECT, UBA and WWE domain containing E3 ubiquitin protein ligase 1
ELP1	8518	elongator acetyltransferase complex subunit 1
ING3	54556	inhibitor of growth family member 3
INO80	54617	INO80 complex ATPase subunit
JARID2	3720	jumonji and AT-rich interaction domain containing 2
JMJD1C	221037	jumonji domain containing 1C
KANSL1	284058	KAT8 regulatory NSL complex subunit 1
KAT2A	2648	lysine acetyltransferase 2A
KAT5	10524	lysine acetyltransferase 5
KAT6A	7994	lysine acetyltransferase 6A
KAT6B	23522	lysine acetyltransferase 6B
KAT8	84148	lysine acetyltransferase 8
KDM1A	23028	lysine demethylase 1A
KDM2B	84678	lysine demethylase 2B
KDM3B	51780	lysine demethylase 3B
KDM4B	23030	lysine demethylase 4B
KDM4C	23081	lysine demethylase 4C
KDM5A	5927	lysine demethylase 5A
KDM5B	10765	lysine demethylase 5B
KDM5C	8242	lysine demethylase 5C
KDM6A	7403	lysine demethylase 6A
KDM6B	23135	lysine demethylase 6B
KMT2A	4297	lysine methyltransferase 2A
KMT2B	9757	lysine methyltransferase 2B
KMT2C	58508	lysine methyltransferase 2C
KMT2D	8085	lysine methyltransferase 2D
KMT2E	55904	lysine methyltransferase 2E (inactive)
LAS1L	81887	LAS1 like ribosome biogenesis factor
LEO1	123169	LEO1 homolog, Paf1/RNA polymerase II complex component
MAP3K7	6885	mitogen-activated protein kinase kinase kinase 7
MBD5	55777	methyl-CpG binding domain protein 5
MBNL3	55796	muscleblind like splicing regulator 3
MECP2	4204	methyl-CpG binding protein 2
METTL4	64863	methyltransferase 4, N6-adenosine
MLLT1	4298	MLLT1 super elongation complex subunit
MPHOSPH8	54737	M-phase phosphoprotein 8
MSL2	55167	MSL complex subunit 2
MSL3	10943	MSL complex subunit 3
MTF2	22823	metal response element binding transcription factor 2
NAA60	79903	N-alpha-acetyltransferase 60, NatF catalytic subunit
NAT10	55226	N-acetyltransferase 10
NBN	4683	nibrin
NCOR1	9611	nuclear receptor corepressor 1
NIPBL	25836	NIPBL cohesin loading factor
NSD1	64324	nuclear receptor binding SET domain protein 1
NSRP1	84081	nuclear speckle splicing regulatory protein 1
NSUN2	54888	NOP2/Sun RNA methyltransferase 2
NSUN6	221078	NOP2/Sun RNA methyltransferase 6
OGT	8473	O-linked N-acetylglucosamine (GlcNAc) transferase
PAGR1	79447	PAXIP1 associated glutamate rich protein 1
PAK2	5062	p21 (RAC1) activated kinase 2
PARP1	142	poly(ADP-ribose) polymerase 1
PBRM1	55193	polybromo 1
PCGF2	7703	polycomb group ring finger 2
PDP1	54704	pyruvate dehydrogenase phosphatase catalytic subunit 1
PHC1	1911	polyhomeotic homolog 1
PHF12	57649	PHD finger protein 12
PHF2	5253	PHD finger protein 2
PHF21A	51317	PHD finger protein 21A
PHF8	23133	PHD finger protein 8
PHIP	55023	pleckstrin homology domain interacting protein
POGZ	23126	pogo transposable element derived with ZNF domain
PPARGC1A	10891	PPARG coactivator 1 alpha
PPP2CA	5515	protein phosphatase 2 catalytic subunit alpha
PQBP1	10084	polyglutamine binding protein 1
PRDM13	59336	PR/SET domain 13
PRKCA	5578	protein kinase C alpha
PRKDC	5591	protein kinase, DNA-activated, catalytic subunit
PRMT7	54496	protein arginine methyltransferase 7
PRMT9	90826	protein arginine methyltransferase 9
PUF60	22827	poly(U) binding splicing factor 60
RAI1	10743	retinoic acid induced 1
RBBP5	5929	RB binding protein 5, histone lysine methyltransferase complex subunit
RBMX	27316	RNA binding motif protein X-linked
RBFOX1	54715	RNA binding fox-1 homolog 1
RLIM	51132	ring finger protein, LIM domain interacting
RNF168	165918	ring finger protein 168
RNF2	6045	ring finger protein 2
RPS6KA3	6197	ribosomal protein S6 kinase A3
RRP8	23378	ribosomal RNA processing 8
RSRC1	51319	arginine and serine rich coiled-coil 1
SATB2	23314	SATB homeobox 2
SET	6418	SET nuclear proto-oncogene
SETD1A	9739	SET domain containing 1A, histone lysine methyltransferase
SETD1B	23067	SET domain containing 1B, histone lysine methyltransferase
SETD2	29072	SET domain containing 2, histone lysine methyltransferase
SETD5	55209	SET domain containing 5
SF3B1	23451	splicing factor 3b subunit 1
SF3B3	23450	splicing factor 3b subunit 3
SIN3A	25942	SIN3 transcription regulator family member A
SIN3B	23309	SIN3 transcription regulator family member B
SIRT2	22933	sirtuin 2
SMARCA1	6594	SNF2 related chromatin remodeling ATPase 1
SMARCA2	6595	SWI/SNF related BAF chromatin remodeling complex subunit ATPase 2
SMARCA4	6597	SWI/SNF related BAF chromatin remodeling complex subunit ATPase 4
SMARCA5	8467	SNF2 related chromatin remodeling ATPase 5
SMARCB1	6598	SWI/SNF related BAF chromatin remodeling complex subunit B1
SMARCC1	6599	SWI/SNF related BAF chromatin remodeling complex subunit C1
SMARCC2	6601	SWI/SNF related BAF chromatin remodeling complex subunit C2
SMARCD1	6602	SWI/SNF related BAF chromatin remodeling complex subunit D1
SMARCD2	6603	SWI/SNF related BAF chromatin remodeling complex subunit D2
SMARCE1	6605	SWI/SNF related BAF chromatin remodeling complex subunit E1
SPEN	23013	spen family transcriptional repressor
SPOP	8405	speckle type BTB/POZ protein
SRCAP	10847	Snf2 related CREBBP activator protein
SRSF1	6426	serine and arginine rich splicing factor 1
SUPT16H	11198	SPT16 homolog, facilitates chromatin remodeling subunit
SUPT7L	9913	SPT7 like, STAGA complex subunit gamma
SUV39H2	79723	SUV39H2 histone lysine methyltransferase
KMT5B	51111	lysine methyltransferase 5B
SUZ12	23512	SUZ12 polycomb repressive complex 2 subunit
SYNCRIP	10492	synaptotagmin binding cytoplasmic RNA interacting protein
TADA1	117143	transcriptional adaptor 1
TAF1	6872	TATA-box binding protein associated factor 1
TAF1L	138474	TATA-box binding protein associated factor 1 like
TAF2	6873	TATA-box binding protein associated factor 2
TAF4	6874	TATA-box binding protein associated factor 4
TAF6	6878	TATA-box binding protein associated factor 6
TAF8	129685	TATA-box binding protein associated factor 8
TBL1XR1	79718	TBL1X/Y related 1
TET1	80312	tet methylcytosine dioxygenase 1
TET3	200424	tet methylcytosine dioxygenase 3
TLE1	7088	TLE family member 1, transcriptional corepressor
TLK1	9874	tousled like kinase 1
TLK2	11011	tousled like kinase 2
TOP2B	7155	DNA topoisomerase II beta
TRA2B	6434	transformer 2 beta homolog
TRRAP	8295	transformation/transcription domain associated protein
U2AF2	11338	U2 small nuclear RNA auxiliary factor 2
UBE2A	7319	ubiquitin conjugating enzyme E2 A
UBE2H	7328	ubiquitin conjugating enzyme E2 H
UBR7	55148	ubiquitin protein ligase E3 component n-recognin 7
UIMC1	51720	ubiquitin interaction motif containing 1
USP15	9958	ubiquitin specific peptidase 15
USP44	84101	ubiquitin specific peptidase 44
USP7	7874	ubiquitin specific peptidase 7
VRK1	7443	VRK serine/threonine kinase 1
WAC	51322	WW domain containing adaptor with coiled-coil
WDR5	11091	WD repeat domain 5
NSD2	7468	nuclear receptor binding SET domain protein 2
YWHAE	7531	tyrosine 3-monooxygenase/tryptophan 5-monooxygenase activation protein epsilon
YWHAZ	7534	tyrosine 3-monooxygenase/tryptophan 5-monooxygenase activation protein zeta
YY1	7528	YY1 transcription factor
ZBTB16	7704	zinc finger and BTB domain containing 16
ZMYM2	7750	zinc finger MYM-type containing 2
ZMYM3	9203	zinc finger MYM-type containing 3
ZMYND11	10771	zinc finger MYND-type containing 11
ZMYND8	23613	zinc finger MYND-type containing 8
ZNF592	9640	zinc finger protein 592
ZNF711	7552	zinc finger protein 711
MACROH2A1	9555	macroH2A.1 histone
H3-3A	3020	H3.3 histone A
H3-3B	3021	H3.3 histone B
H1-2	3006	H1.2 linker histone, cluster member
H1-4	3008	H1.4 linker histone, cluster member
H2AC6	8334	H2A clustered histone 6
H4C2	8366	H4 clustered histone 2
H4C3	8364	H4 clustered histone 3
H4C4	8360	H4 clustered histone 4
H4C5	8367	H4 clustered histone 5
H4C6	8361	H4 clustered histone 6
H4C9	8294	H4 clustered histone 9
H4C11	8363	H4 clustered histone 11
H3-4	8290	H3.4 histone, cluster member
