# Supplementary material for: CRONDEX: a web-based platform for exploring links between chromatin- related genes and neurodevelopmental disorders
Source: Research Square preprint supplement (doi:10.21203/rs.3.rs-8767656/v1), 2026-02-11
Supplement: Supplementary file 1 [file b011cd8a6db70963565d3bbe.pdf]

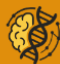

# CRONDEX

ChROmatin and NeuroDevelopmental disorder-related genes EXploratory platform

About CRONDEX

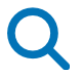

## Gene-Based Query

Find genes with similar clinical phenotypes based on a gene of interest.

Go to Tool

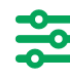

## Criteria-Based Query

Retrieve genes based on GO terms, KEGG pathways, and other annotations.

Go to Tool

## Further Analysis Options

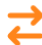

Compare Two Genes

Go to Tool

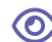

Single-Gene Query

Go to Tool
