# Supplementary material for: CRONDEX: a web-based platform for exploring links between chromatin- related genes and neurodevelopmental disorders
Source: Research Square preprint supplement (doi:10.21203/rs.3.rs-8767656/v1), 2026-02-11
Supplement: Supplementary file 2 [file 5b50d3436df87b9a3b8f830c.xlsx]

## Sheet: ST2-HM-LD-31-genes
Gene	Classification	Target / Function	In KEGG Lysine Degradation?
KDM6A	Eraser	H3K27	0
KDM5A	Eraser	H3K4	0
KDM5C	Eraser	H3K4	0
KDM3B	Eraser	H3K9	0
PHF8	Eraser	H3K9	0
JMJD1C	Eraser	H3K9?	0
KDM4B	Eraser	H3K9/36	0
SETD5	Reader/Other	Scaffold	0
PRMT7	Reader/Other	Arginine	0
KANSL1	Reader/Other	NSL Complex	0
JARID2	Reader/Other	PRC2 Complex	0
SUZ12	Reader/Other	PRC2 Complex	0
PHF21A	Reader/Other	Reader	0
POGZ	Reader/Other	Reader	0
MECP2	Reader/Other	CpG Reader	0
CIT	Reader/Other	Kinase	0
BRCA1	Reader/Other	DNA Repair	0
LAS1L	Reader/Other	Ribosome	0
PRDM13	Reader/Other	TF (Transcription Factor)	0
EZH2	Writer	H3K27	1
ASH1L	Writer	H3K36	1
NSD1	Writer	H3K36	1
NSD2	Writer	H3K36	1
SETD2	Writer	H3K36	1
KMT2A	Writer	H3K4	1
KMT2B	Writer	H3K4	1
KMT2C	Writer	H3K4	1
KMT2D	Writer	H3K4	1
SETD1A	Writer	H3K4	1
EHMT1	Writer	H3K9	1
KMT5B	Writer	H4K20	1
